# Supplementary material for: Cathepsin L secretion by host and neoplastic cells potentiates invasion
Source: PubMed Central journal article supplement (PMC6756864; doi:10.18632/oncotarget.27182), 2019-09-17
Supplement: oncotarget-10-5560-s001.pdf [file oncotarget-10-5560-s001.pdf]

## Cathepsin L secretion by host and neoplastic cells potentiates invasion

### SUPPLEMENTARY MATERIALS FIGURE

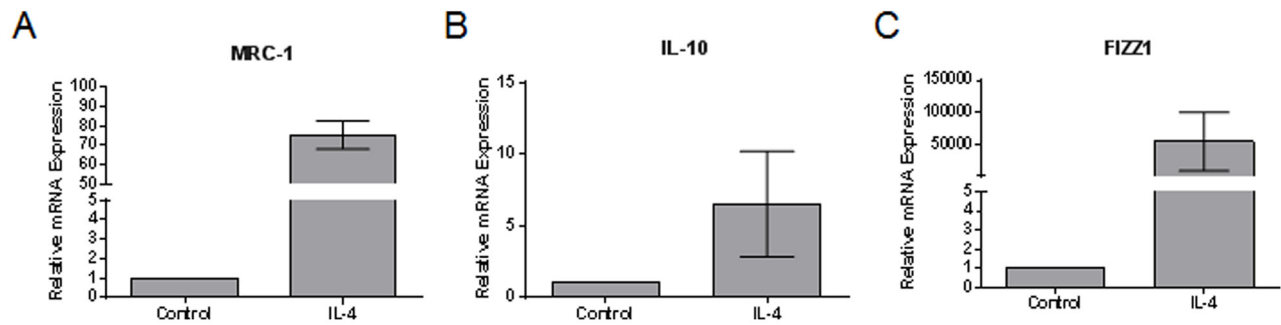

**Supplementary Figure 1: IL-4 upregulates the expression of M2-associated gene products.** Raw264.7 macrophages were stimulated with 10 ng/mL IL-4 for 48 h. Relative mRNA expression for (A) MRC-1, (B) IL-10, and (C) FIZZ1 was analyzed by semi-quantitative RT-PCR.
