# Supplementary material for: Cathepsin L secretion by host and neoplastic cells potentiates invasion
Source: PubMed Central journal article supplement (PMC6756864; doi:10.18632/oncotarget.27182), 2019-09-17
Supplement: oncotarget-10-5560-s002.pdf [file oncotarget-10-5560-s002.pdf]

# Cathepsin L secretion by host and neoplastic cells potentiates invasion

## SUPPLEMENTARY MATERIALS FIGURE

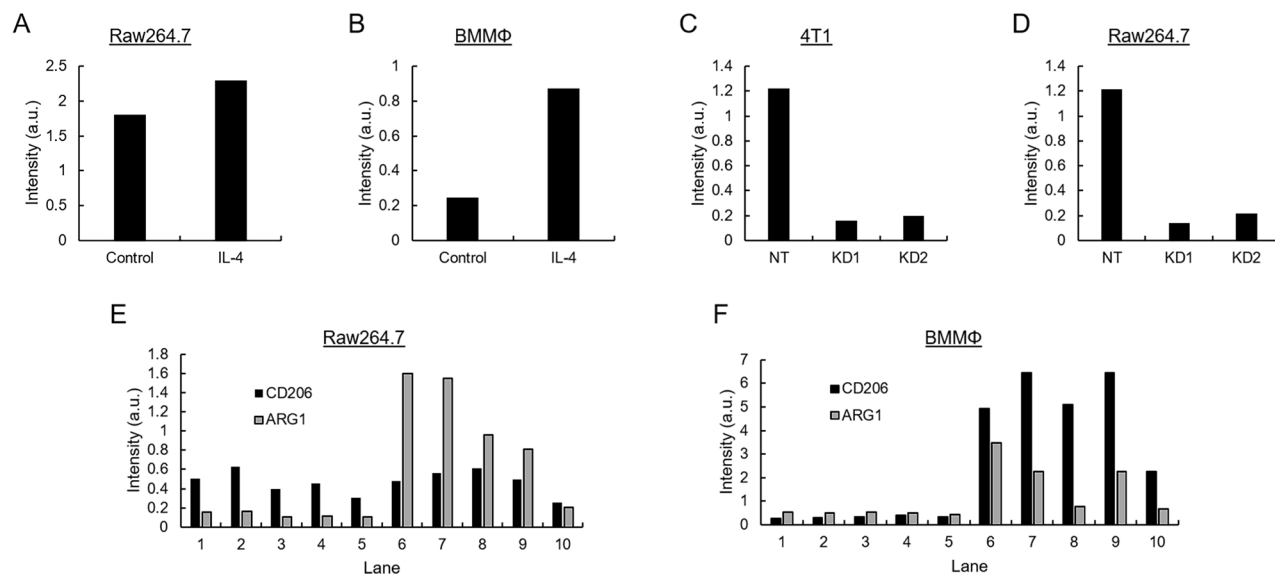

**Supplementary Figure 2: Densitometry quantification of immunoblots.** (A) Densitometry for Figure 1A. (B) Densitometry for Figure 1C. (C) Densitometry for Figure 4A. (D) Densitometry for Figure 4D. (E) Densitometry for Figure 5A. (F) Densitometry for Figure 5B.
